# Supplementary material for: Development of 3D Printed Bruch’s Membrane-Mimetic Substance for the Maturation of Retinal Pigment Epithelial Cells
Source: PubMed Central journal article supplement (PMC7865340; doi:10.3390/ijms22031095), 2021-01-22
Supplement: ijms-22-01095-s001.pdf [file ijms-22-01095-s001.pdf]

## Supporting Information

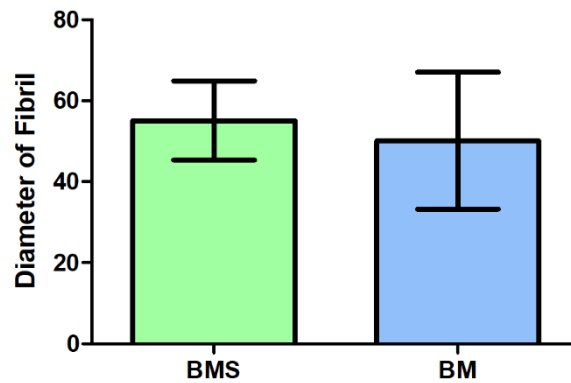

**Figure S1. Diameter of fibril in Bruch's membrane mimetic substrate (BMS) and natural Bruch's membrane (BM).** The diameter of each fibril was measured with ImageJ software. The error bars represent the standard deviation ( $n = 3$ ).

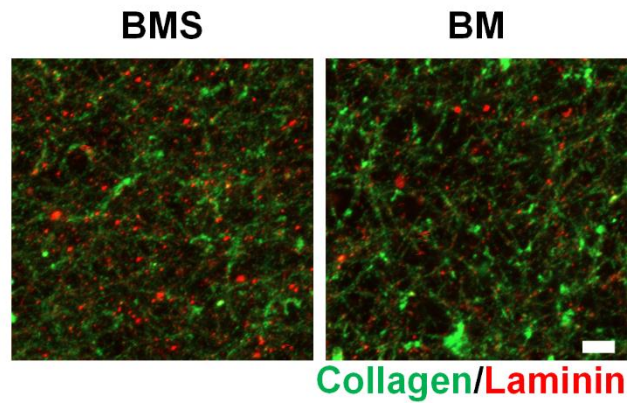

**Figure S2. Immunostaining of collagen type 1 and laminin in Bruch's membrane mimetic substrate (BMS) and Bruch's membrane (BM).** Scale bars: 5  $\mu\text{m}$

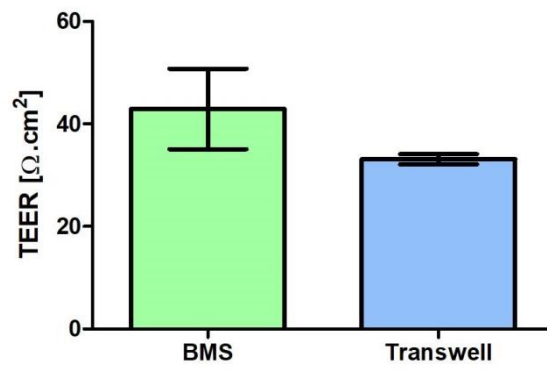

**Figure S3. TEER value of the BMS and Transwell.** The error bars represent the standard deviation (n = 3)

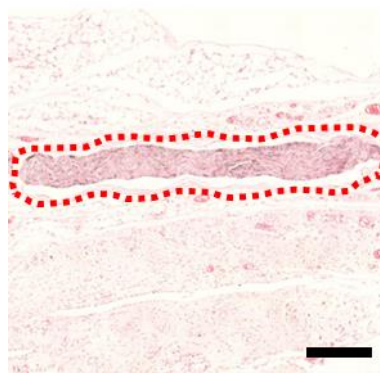

**Figure S4. Histology of subcutaneous implanted BMS.** Scale bars: 200  $\mu\text{m}$ .
